# Supplementary material for: 1399 H&E-stained sentinel lymph node sections of breast cancer patients: the CAMELYON dataset
Source: PubMed Central journal article supplement (PMC6007545; doi:10.1093/gigascience/giy065), 2018-05-31
Supplement: giy065_response_to_reviewer_comments_revision1.pdf [file giy065_response_to_reviewer_comments_revision1.pdf]

## Author's Response To Reviewer Comments

Close

We thank the reviewers for their positive comments. We have addressed the comment of the editor and added the proposed section.

Close
